# Supplementary material for: Brain Epitranscriptomic Analysis Revealed Altered A-to-I RNA Editing in Septic Patients
Source: Front Genet. 2022 Apr 26;13:887001. doi: 10.3389/fgene.2022.887001 (PMC9086164; doi:10.3389/fgene.2022.887001)
Supplement: Supplementary file 6 [file DataSheet2.xlsx]

## Sheet: Table S2
Table S2. A-to-I RNA editing sites unique to controls.
site_id	Consequence	NTchange	AAchange	BIOTYPE	SYMBOL	known_site	Repeat	SIFT	PolyPhen
AAK1:chr2:69467460	3_prime_UTR_variant	c.*8409A>G	-	protein_coding	AAK1	FALSE	-	-	-
AC004076.1:chr19:57454841	intron_variant	c.347+812A>G	-	protein_coding	AC004076.1	TRUE	AluSz6	-	-
AC004076.1:chr19:57454866	intron_variant	c.347+787A>G	-	protein_coding	AC004076.1	TRUE	AluSz6	-	-
AC008764.4:chr19:16642736	intron_variant	c.115+16659A>G	-	protein_coding	AC008764.4	TRUE	AluJo	-	-
AC027644.4:chr7:66687564	intron_variant	c.397+48635A>G	-	nonsense_mediated_decay	AC027644.4	FALSE	AluJr	-	-
AC092691.1:chr3:117997349	non_coding_transcript_exon_variant	n.231A>G	-	lncRNA	AC092691.1	FALSE	-	-	-
AC093668.1:chr7:102559899	intron_variant	c.749+6683A>G	-	protein_coding	AC093668.1	TRUE	AluJr	-	-
AC096677.1:chr1:201515335	intron_variant,non_coding_transcript_variant	n.179+7916A>G	-	lncRNA	AC096677.1	TRUE	LTR8	-	-
AC096677.1:chr1:201515347	intron_variant,non_coding_transcript_variant	n.179+7928A>G	-	lncRNA	AC096677.1	TRUE	LTR8	-	-
AC099811.2:chr17:42130471	missense_variant	c.32A>G	p.N11S	protein_coding	AC099811.2	FALSE	-	tolerated_low_confidence	probably_damaging
AC124312.1:chr15:24983638	intron_variant	c.*953+1201A>G	-	nonsense_mediated_decay	AC124312.1	TRUE	AluSx	-	-
AC138904.3:chr16:28275872	intron_variant,non_coding_transcript_variant	n.818-14438A>G	-	lncRNA	AC138904.3	TRUE	AluJo	-	-
ACBD7:chr10:15076635	3_prime_UTR_variant	c.*1895A>G	-	protein_coding	ACBD7	TRUE	AluSx	-	-
ACTG1:chr17:81510287	3_prime_UTR_variant	c.*403A>G	-	protein_coding	ACTG1	FALSE	-	-	-
ACTG1:chr17:81510289	3_prime_UTR_variant	c.*401A>G	-	protein_coding	ACTG1	TRUE	-	-	-
ADCY1:chr7:45718852	3_prime_UTR_variant	c.*4857A>G	-	protein_coding	ADCY1	FALSE	-	-	-
ADGRB3:chr6:68801568	intron_variant	c.758-128991A>G	-	protein_coding	ADGRB3	TRUE	AluSq2	-	-
ADGRB3:chr6:68844921	intron_variant	c.758-85638A>G	-	protein_coding	ADGRB3	FALSE	L1MA3	-	-
AGAP1:chr2:236079157	intron_variant	c.2114+29876A>G	-	protein_coding	AGAP1	FALSE	L2c	-	-
AGBL4:chr1:49398401	intron_variant	c.283-152537A>G	-	protein_coding	AGBL4	FALSE	MLT2B2	-	-
AGBL4:chr1:49630184	intron_variant	c.282+67129A>G	-	protein_coding	AGBL4	FALSE	ERV3-16A3_I-int	-	-
AL731577.2:chr10:124917216	non_coding_transcript_exon_variant	n.74A>G	-	lncRNA	AL731577.2	FALSE	-	-	-
ANK3:chr10:60149289	intron_variant	c.2615-10202A>G	-	protein_coding	ANK3	FALSE	-	-	-
ANKRD24:chr19:4215364	intron_variant	c.1198-614A>G	-	protein_coding	ANKRD24	TRUE	AluSx	-	-
ANKS1B:chr12:98914224	intron_variant	c.2779-82088A>G	-	protein_coding	ANKS1B	FALSE	MSTB	-	-
APOD:chr3:195568842	3_prime_UTR_variant	c.*58A>G	-	protein_coding	APOD	FALSE	-	-	-
ARMC2:chr6:108966916	intron_variant	c.2446+1776A>G	-	protein_coding	ARMC2	TRUE	-	-	-
ASH1L:chr1:155521423	missense_variant	c.97A>G	p.S33G	protein_coding	ASH1L	FALSE	-	tolerated_low_confidence	benign
ASTN2:chr9:117279909	intron_variant	c.630+11417A>G	-	protein_coding	ASTN2	TRUE	-	-	-
ATRNL1:chr10:115114266	intron_variant	c.294-5919A>G	-	protein_coding	ATRNL1	TRUE	L1MA7	-	-
ATXN2:chr12:111585546	intron_variant	c.731+13238A>G	-	protein_coding	ATXN2	TRUE	AluSq2	-	-
ATXN2:chr12:111585548	intron_variant	c.731+13236A>G	-	protein_coding	ATXN2	TRUE	AluSq2	-	-
BAALC:chr8:103229766	3_prime_UTR_variant	c.*1667A>G	-	protein_coding	BAALC	FALSE	-	-	-
BRI3BP:chr12:125029425	3_prime_UTR_variant	c.*3995A>G	-	protein_coding	BRI3BP	TRUE	AluSx1	-	-
C20orf194:chr20:3261166	intron_variant	c.2874-1138A>G	-	protein_coding	C20orf194	TRUE	AluJr	-	-
CA11:chr19:48646047	5_prime_UTR_variant	c.-415A>G	-	protein_coding	CA11	FALSE	(CTCCTCC)n	-	-
CACNA1A:chr19:13306912	intron_variant	c.1989+870A>G	-	protein_coding	CACNA1A	FALSE	MER74A	-	-
CAMK2A:chr5:150255910	intron_variant	c.411+663A>G	-	protein_coding	CAMK2A	FALSE	MIRc	-	-
CAVIN1:chr17:42403628	3_prime_UTR_variant	c.*1059A>G	-	protein_coding	CAVIN1	TRUE	AluSx	-	-
CCDC18-AS1:chr1:93334068	intron_variant,non_coding_transcript_variant	n.2291+3309A>G	-	lncRNA	CCDC18-AS1	TRUE	AluJr	-	-
CDC42BPA:chr1:227312903	intron_variant	c.178+4102A>G	-	protein_coding	CDC42BPA	FALSE	MSTA	-	-
CDH10:chr5:24608563	intron_variant	c.-123-14950A>G	-	protein_coding	CDH10	TRUE	AluSc	-	-
CDK13:chr7:39951044	missense_variant	c.403A>G	p.S135G	protein_coding	CDK13	TRUE	-	tolerated_low_confidence	benign
CERCAM:chr9:128437297	3_prime_UTR_variant	c.*449A>G	-	protein_coding	CERCAM	FALSE	-	-	-
CERT1:chr5:75377926	intron_variant	c.*9+1411A>G	-	protein_coding	CERT1	TRUE	AluJr	-	-
CHMP4B:chr20:33811562	missense_variant	c.94A>G	p.T32A	protein_coding	CHMP4B	FALSE	-	tolerated	possibly_damaging
CHSY3:chr5:130145621	intron_variant	c.1087-38608A>G	-	protein_coding	CHSY3	TRUE	L1MA6	-	-
CNDP1:chr18:74572694	intron_variant	c.841+1424A>G	-	protein_coding	CNDP1	TRUE	AluJb	-	-
CNNM1:chr10:99329893	missense_variant	c.506A>G	p.K169R	protein_coding	CNNM1	FALSE	(GGAGC)n	tolerated	benign
CNTNAP2:chr7:146130680	intron_variant	c.97+13707A>G	-	protein_coding	CNTNAP2	TRUE	THE1D	-	-
CNTNAP2:chr7:147214942	intron_variant	c.1348+82433A>G	-	protein_coding	CNTNAP2	FALSE	THE1D	-	-
COL26A1:chr7:101414541	intron_variant	c.159-5436A>G	-	protein_coding	COL26A1	TRUE	AluSx1	-	-
CTNNA2:chr2:79951545	intron_variant	c.1056+41748A>G	-	protein_coding	CTNNA2	TRUE	AluSz	-	-
CTNND2:chr5:11139932	intron_variant	c.2159+19644A>G	-	protein_coding	CTNND2	TRUE	MLT1D	-	-
DANT2:chrX:115929726	intron_variant,non_coding_transcript_variant	n.201-10577A>G	-	lncRNA	DANT2	TRUE	L1MA1	-	-
DLG2:chr11:83499759	intron_variant	c.2194-15531A>G	-	protein_coding	DLG2	FALSE	MLT2A1	-	-
DLGAP3:chr1:34885027	missense_variant	c.1951A>G	p.S651G	protein_coding	DLGAP3	FALSE	-	tolerated	possibly_damaging
DNM1:chr9:128229466	intron_variant	c.1336-4555A>G	-	protein_coding	DNM1	TRUE	AluJb	-	-
DPYSL3:chr5:147393703	3_prime_UTR_variant	c.*332A>G	-	protein_coding	DPYSL3	FALSE	-	-	-
DPYSL3:chr5:147400769	missense_variant	c.1375A>G	p.K459E	protein_coding	DPYSL3	FALSE	-	deleterious	possibly_damaging
EIF4G1:chr3:184327252	synonymous_variant	c.3486A>G	p.G1162=	protein_coding	EIF4G1	FALSE	-	-	-
ERBIN:chr5:66033998	intron_variant	c.1207-4385A>G	-	protein_coding	ERBIN	TRUE	AluSx	-	-
FAM155A:chr13:107509903	intron_variant	c.916-299148A>G	-	protein_coding	FAM155A	TRUE	AluJb	-	-
FAM155A:chr13:107836129	intron_variant	c.915+29553A>G	-	protein_coding	FAM155A	TRUE	AluJb	-	-
FAM171A1:chr10:15266149	intron_variant	c.418+9706A>G	-	protein_coding	FAM171A1	FALSE	(TCTGCT)n	-	-
FAM95C:chr9:38545574	intron_variant	c.559-2211A>G	-	nonsense_mediated_decay	FAM95C	FALSE	-	-	-
FAM95C:chr9:38551436	intron_variant	c.559-8073A>G	-	nonsense_mediated_decay	FAM95C	TRUE	MSTA-int	-	-
FAM95C:chr9:38554521	intron_variant	c.559-11158A>G	-	nonsense_mediated_decay	FAM95C	TRUE	MSTA-int	-	-
FAM95C:chr9:38554524	intron_variant	c.559-11161A>G	-	nonsense_mediated_decay	FAM95C	TRUE	MSTA-int	-	-
FAM95C:chr9:38554532	intron_variant	c.559-11169A>G	-	nonsense_mediated_decay	FAM95C	TRUE	MSTA-int	-	-
FBXW7:chr4:152478267	intron_variant	c.-70+56674A>G	-	protein_coding	FBXW7	FALSE	L1MB4	-	-
FGF14:chr13:102126259	intron_variant	c.209-250963A>G	-	protein_coding	FGF14	TRUE	L1MB4	-	-
FGF14:chr13:102178598	intron_variant	c.208+222873A>G	-	protein_coding	FGF14	TRUE	L1PB4	-	-
FP671120.4:chr21:8213359	intron_variant,non_coding_transcript_variant	n.624-9602A>G	-	lncRNA	FP671120.4	FALSE	-	-	-
FRMD4A:chr10:14005054	intron_variant	c.46-146142A>G	-	protein_coding	FRMD4A	TRUE	AluSc	-	-
FRMD4A:chr10:14209162	intron_variant	c.45+120896A>G	-	protein_coding	FRMD4A	TRUE	MLT1C	-	-
FRMD4A:chr10:14243400	intron_variant	c.45+86658A>G	-	protein_coding	FRMD4A	FALSE	THE1D	-	-
FRRS1L:chr9:109132247	3_prime_UTR_variant	c.*5208A>G	-	protein_coding	FRRS1L	TRUE	AluYm1	-	-
FRRS1L:chr9:109135572	3_prime_UTR_variant	c.*1883A>G	-	protein_coding	FRRS1L	TRUE	AluSz6	-	-
FRRS1L:chr9:109160383	intron_variant	c.238+6518A>G	-	protein_coding	FRRS1L	FALSE	-	-	-
FTX:chrX:74197446	intron_variant,non_coding_transcript_variant	n.695+76896A>G	-	lncRNA	FTX	TRUE	L1MA9	-	-
GABRB1:chr4:47198857	intron_variant	c.461+37388A>G	-	protein_coding	GABRB1	TRUE	THE1D	-	-
GABRB1:chr4:47198878	intron_variant	c.461+37409A>G	-	protein_coding	GABRB1	TRUE	THE1D	-	-
GAN:chr16:81387695	3_prime_UTR_variant	c.*10099A>G	-	protein_coding	GAN	TRUE	AluSx1	-	-
GFAP:chr17:44911311	missense_variant	c.1052A>G	p.D351G	protein_coding	GFAP	FALSE	-	deleterious	possibly_damaging
GIPC1:chr19:14482793	missense_variant	c.184A>G	p.T62A	protein_coding	GIPC1	TRUE	-	tolerated	benign
GNAQ:chr9:78031444	5_prime_UTR_variant	c.-209A>G	-	protein_coding	GNAQ	FALSE	-	-	-
GNB1:chr1:1857331	intron_variant	c.-95-18093A>G	-	protein_coding	GNB1	TRUE	-	-	-
GNL3L:chrX:54563379	3_prime_UTR_variant	c.*2777A>G	-	protein_coding	GNL3L	TRUE	-	-	-
GPC1:chr2:240458066	intron_variant	c.167-964A>G	-	protein_coding	GPC1	FALSE	-	-	-
GPHN:chr14:66518463	intron_variant	c.64+9872A>G	-	protein_coding	GPHN	FALSE	L1MA5A	-	-
GPHN:chr14:66590258	intron_variant	c.64+81667A>G	-	protein_coding	GPHN	TRUE	L1PA7	-	-
GSTO1:chr10:104261101	intron_variant	c.366+1303A>G	-	protein_coding	GSTO1	TRUE	L2a	-	-
HABP4:chr9:96490217	3_prime_UTR_variant	c.*179A>G	-	protein_coding	HABP4	FALSE	-	-	-
HDAC5:chr17:44087567	missense_variant	c.1732A>G	p.T578A	protein_coding	HDAC5	FALSE	-	tolerated	benign
HIF3A:chr19:46317082	intron_variant	c.1026-3361A>G	-	protein_coding	HIF3A	TRUE	AluJb	-	-
HNRNPC:chr14:21257741	intron_variant	c.-37+5570A>G	-	protein_coding	HNRNPC	TRUE	AluJr4	-	-
HNRNPKP2:chr2:136200450	non_coding_transcript_exon_variant	n.54A>G	-	processed_pseudogene	HNRNPKP2	FALSE	-	-	-
HS3ST4:chr16:25831380	intron_variant	c.734+138229A>G	-	protein_coding	HS3ST4	FALSE	AluJr	-	-
HS6ST3:chr13:96597156	intron_variant	c.708-235334A>G	-	protein_coding	HS6ST3	TRUE	L1PA13	-	-
IDH3A:chr15:78162241	missense_variant	c.485A>G	p.D162G	protein_coding	IDH3A	FALSE	-	tolerated	benign
INSR:chr19:7117135	missense_variant	c.4070A>G	p.E1357G	protein_coding	INSR	FALSE	-	deleterious	possibly_damaging
ITPR1:chr3:4676791	missense_variant	c.2912A>G	p.E971G	protein_coding	ITPR1	FALSE	-	deleterious	possibly_damaging
KANSL3:chr2:96635079	intron_variant	c.215+1842A>G	-	protein_coding	KANSL3	TRUE	L2	-	-
KAZN:chr1:14294499	intron_variant	c.249+113907A>G	-	protein_coding	KAZN	FALSE	MIRb	-	-
KCNIP4:chr4:21483905	intron_variant	c.61+464666A>G	-	protein_coding	KCNIP4	FALSE	MSTA	-	-
KCNIP4:chr4:21784021	intron_variant	c.61+164550A>G	-	protein_coding	KCNIP4	TRUE	THE1D	-	-
KCNIP4:chr4:21839566	intron_variant	c.61+109005A>G	-	protein_coding	KCNIP4	TRUE	AluSp	-	-
KCNIP4:chr4:21936338	intron_variant	c.61+12233A>G	-	protein_coding	KCNIP4	TRUE	THE1B	-	-
KCNIP4:chr4:21944441	intron_variant	c.61+4130A>G	-	protein_coding	KCNIP4	TRUE	AluSz	-	-
KCTD16:chr5:144332851	intron_variant	c.832+125305A>G	-	protein_coding	KCTD16	FALSE	THE1B	-	-
KIAA1217:chr10:24538482	intron_variant	c.3534+1589A>G	-	protein_coding	KIAA1217	TRUE	AluJr	-	-
KIF1B:chr1:10284118	intron_variant	c.1296+1585A>G	-	protein_coding	KIF1B	TRUE	AluJo	-	-
KIF1B:chr1:10377684	3_prime_UTR_variant	c.*1097A>G	-	protein_coding	KIF1B	TRUE	AluSg	-	-
LIMCH1:chr4:41366950	intron_variant	c.96+6014A>G	-	protein_coding	LIMCH1	TRUE	THE1D	-	-
LINC00342:chr2:95830086	intron_variant,non_coding_transcript_variant	n.27-199A>G	-	lncRNA	LINC00342	TRUE	L1PA12	-	-
LMF1:chr16:857860	intron_variant	c.1530-3154A>G	-	protein_coding	LMF1	TRUE	-	-	-
LRP1B:chr2:141882823	intron_variant	c.83-72422A>G	-	protein_coding	LRP1B	TRUE	FRAM	-	-
LRRTM4:chr2:77041436	intron_variant	c.1555-292520A>G	-	protein_coding	LRRTM4	TRUE	L1MA6	-	-
LRRTM4:chr2:77218123	intron_variant	c.1554+300195A>G	-	protein_coding	LRRTM4	TRUE	AluSp	-	-
MAP3K3:chr17:63666378	intron_variant	c.475-562A>G	-	protein_coding	MAP3K3	TRUE	FLAM_C	-	-
MDGA2:chr14:47609381	intron_variant	c.280+65136A>G	-	protein_coding	MDGA2	FALSE	L1PB1	-	-
MDM2:chr12:68843739	3_prime_UTR_variant	c.*3890A>G	-	protein_coding	MDM2	TRUE	-	-	-
MEGF8:chr19:42377274	3_prime_UTR_variant	c.*499A>G	-	protein_coding	MEGF8	FALSE	L2a	-	-
METTL7A:chr12:50931523	3_prime_UTR_variant	c.*1373A>G	-	protein_coding	METTL7A	TRUE	AluSq2	-	-
MFN1:chr3:179375233	missense_variant	c.989A>G	p.Q330R	protein_coding	MFN1	TRUE	-	tolerated	benign
MLLT10:chr10:21544760	intron_variant	c.240+5848A>G	-	protein_coding	MLLT10	FALSE	-	-	-
MORN1:chr1:2370825	intron_variant	c.745+1656A>G	-	protein_coding	MORN1	TRUE	AluJb	-	-
MPHOSPH8:chr13:19673001	3_prime_UTR_variant	c.*1126A>G	-	protein_coding	MPHOSPH8	TRUE	AluJb	-	-
MTFMT:chr15:65011625	intron_variant	c.813+4811A>G	-	protein_coding	MTFMT	TRUE	AluJb	-	-
MTRNR2L1:chr17:22524413	3_prime_UTR_variant	c.*277A>G	-	protein_coding	MTRNR2L1	FALSE	-	-	-
NALCN:chr13:101365361	intron_variant	c.644+11339A>G	-	protein_coding	NALCN	FALSE	L1PA15	-	-
NEAT1:chr11:65439446	non_coding_transcript_exon_variant	n.16649A>G	-	lncRNA	NEAT1	TRUE	AluSz6	-	-
NEAT1:chr11:65439579	non_coding_transcript_exon_variant	n.16782A>G	-	lncRNA	NEAT1	TRUE	AluSz6	-	-
NEFM:chr8:24917999	missense_variant	c.2144A>G	p.E715G	protein_coding	NEFM	FALSE	GA-rich	tolerated	benign
NPAS3:chr14:33037560	intron_variant	c.51-18345A>G	-	protein_coding	NPAS3	TRUE	AluJo	-	-
NPTXR:chr22:38818994	3_prime_UTR_variant	c.*3615A>G	-	protein_coding	NPTXR	TRUE	MIR3	-	-
NRCAM:chr7:108172444	intron_variant	c.3187+2878A>G	-	protein_coding	NRCAM	TRUE	AluSz	-	-
NRG3:chr10:82001356	intron_variant	c.823+125193A>G	-	protein_coding	NRG3	TRUE	AluSx1	-	-
NRG3:chr10:82099861	intron_variant	c.823+223698A>G	-	protein_coding	NRG3	FALSE	AluJo	-	-
NRXN3:chr14:78864955	intron_variant	c.2275+54611A>G	-	protein_coding	NRXN3	FALSE	MER21A	-	-
NUTM2A-AS1:chr10:87241209	non_coding_transcript_exon_variant	n.5141A>G	-	lncRNA	NUTM2A-AS1	TRUE	MSTB1	-	-
OPCML:chr11:133495572	intron_variant	c.61+36692A>G	-	protein_coding	OPCML	TRUE	L1PB1	-	-
OPCML:chr11:133495573	intron_variant	c.61+36691A>G	-	protein_coding	OPCML	TRUE	L1PB1	-	-
OXR1:chr8:106525402	intron_variant	c.223+6263A>G	-	protein_coding	OXR1	TRUE	MIRb	-	-
PACS1:chr11:66108747	intron_variant	c.356+37905A>G	-	protein_coding	PACS1	FALSE	AluJo	-	-
PBX1:chr1:164606453	intron_variant	c.265+43142A>G	-	protein_coding	PBX1	TRUE	-	-	-
PCDH9:chr13:66929603	intron_variant	c.3037-25998A>G	-	protein_coding	PCDH9	TRUE	AluSp	-	-
PCDH9:chr13:66982196	intron_variant	c.3037-78591A>G	-	protein_coding	PCDH9	FALSE	MSTA	-	-
PCDH9:chr13:67128630	intron_variant	c.3036+96775A>G	-	protein_coding	PCDH9	FALSE	-	-	-
PCDH9:chr13:67153184	intron_variant	c.3036+72221A>G	-	protein_coding	PCDH9	TRUE	AluJo	-	-
PCYOX1:chr2:70278983	3_prime_UTR_variant	c.*1591A>G	-	protein_coding	PCYOX1	TRUE	AluJb	-	-
PDE1A:chr2:182474040	intron_variant	c.101+48236A>G	-	protein_coding	PDE1A	TRUE	L1PA13	-	-
PDE1C:chr7:32015147	intron_variant	c.309-134287A>G	-	protein_coding	PDE1C	TRUE	THE1C	-	-
PHACTR1:chr6:13230135	missense_variant	c.1333A>G	p.R445G	protein_coding	PHACTR1	FALSE	-	tolerated	benign
PIK3C2A:chr11:17207873	non_coding_transcript_exon_variant	n.48A>G	-	processed_transcript	PIK3C2A	FALSE	(CCTCAG)n	-	-
PIP4K2A:chr10:22562948	intron_variant	c.678+4903A>G	-	protein_coding	PIP4K2A	TRUE	-	-	-
PKD2:chr4:88046183	intron_variant	c.1320-459A>G	-	protein_coding	PKD2	TRUE	AluJo	-	-
PLEC:chr8:143923900	missense_variant	c.6440A>G	p.E2147G	protein_coding	PLEC	FALSE	-	deleterious_low_confidence	probably_damaging
PLEKHH1:chr14:67566657	intron_variant	c.1264-2481A>G	-	protein_coding	PLEKHH1	TRUE	AluJb	-	-
PLEKHH1:chr14:67567011	intron_variant	c.1264-2127A>G	-	protein_coding	PLEKHH1	FALSE	-	-	-
PLEKHH1:chr14:67573286	missense_variant	c.1739A>G	p.E580G	protein_coding	PLEKHH1	FALSE	-	deleterious	probably_damaging
POLR2F:chr22:37995701	intron_variant	c.452+9389A>G	-	protein_coding	POLR2F	TRUE	AluJb	-	-
PPP2R2B:chr5:146975750	intron_variant	c.74+79915A>G	-	protein_coding	PPP2R2B	TRUE	L1MB2	-	-
PPP3CA:chr4:101333259	intron_variant	c.58+13480A>G	-	protein_coding	PPP3CA	TRUE	AluJo	-	-
PRNP:chr20:4700695	3_prime_UTR_variant	c.*713A>G	-	protein_coding	PRNP	FALSE	-	-	-
PSMB1:chr6:170550942	intron_variant	c.114-1829A>G	-	protein_coding	PSMB1	TRUE	AluSx1	-	-
PTK2:chr8:140692901	intron_variant	c.2500-6207A>G	-	protein_coding	PTK2	TRUE	-	-	-
PTK2:chr8:140697470	intron_variant	c.2499+3421A>G	-	protein_coding	PTK2	TRUE	AluSx1	-	-
QKI:chr6:163482070	intron_variant	c.402+3174A>G	-	protein_coding	QKI	TRUE	AluJr	-	-
R3HDM2:chr12:57366188	intron_variant	c.-36+29561A>G	-	protein_coding	R3HDM2	TRUE	AluJr	-	-
RAB5B:chr12:55994392	3_prime_UTR_variant	c.*2180A>G	-	protein_coding	RAB5B	FALSE	-	-	-
RAPGEFL1:chr17:40185430	intron_variant	c.833+752A>G	-	protein_coding	RAPGEFL1	TRUE	AluSz	-	-
RASA2:chr3:141546129	intron_variant	c.527+5520A>G	-	protein_coding	RASA2	TRUE	L1MA3	-	-
RBFOX1:chr16:6681232	intron_variant	c.114+26582A>G	-	protein_coding	RBFOX1	TRUE	AluSz	-	-
RBFOX1:chr16:6820548	intron_variant	c.114+165898A>G	-	protein_coding	RBFOX1	TRUE	AluJr	-	-
RBFOX1:chr16:7155499	intron_variant	c.156+103401A>G	-	protein_coding	RBFOX1	TRUE	AluJb	-	-
RBM5:chr3:50099134	intron_variant	c.340-848A>G	-	protein_coding	RBM5	TRUE	AluJb	-	-
RNASEH1:chr2:3545056	3_prime_UTR_variant	c.*729A>G	-	protein_coding	RNASEH1	TRUE	AluSz6	-	-
RNF220:chr1:44463216	intron_variant	c.625+50494A>G	-	protein_coding	RNF220	TRUE	AluSp	-	-
ROBO2:chr3:76617809	intron_variant	c.110-480205A>G	-	protein_coding	ROBO2	TRUE	THE1C	-	-
RPS20:chr8:56069396	intron_variant	c.*35+307A>G	-	protein_coding	RPS20	TRUE	AluSx	-	-
RUFY2:chr10:68367801	intron_variant	c.1431-3688A>G	-	protein_coding	RUFY2	TRUE	AluJr	-	-
SAMD4B:chr19:39363639	intron_variant	c.197-6016A>G	-	protein_coding	SAMD4B	FALSE	MIR	-	-
SCN3B:chr11:123633404	3_prime_UTR_variant	c.*395A>G	-	protein_coding	SCN3B	FALSE	-	-	-
SEPTIN11:chr4:76975016	intron_variant	c.-163-12793A>G	-	protein_coding	SEPTIN11	TRUE	AluSz6	-	-
SGIP1:chr1:66703511	intron_variant	c.1630+8018A>G	-	protein_coding	SGIP1	FALSE	(AC)n	-	-
SLC2A1:chr1:42929741	missense_variant	c.719A>G	p.D240G	protein_coding	SLC2A1	FALSE	-	deleterious	possibly_damaging
SLC35F1:chr6:117907761	missense_variant	c.35A>G	p.Q12R	protein_coding	SLC35F1	FALSE	(CGC)n	tolerated_low_confidence	benign
SLC35F3:chr1:233933824	intron_variant	c.283+28066A>G	-	protein_coding	SLC35F3	TRUE	AluSz6	-	-
SLC38A11:chr2:164948605	intron_variant	c.62-2878A>G	-	protein_coding	SLC38A11	TRUE	MIRb	-	-
SLC44A1:chr9:105379262	intron_variant	c.1633-3861A>G	-	protein_coding	SLC44A1	TRUE	AluJb	-	-
SMAP2:chr1:40393376	intron_variant	c.104-13360A>G	-	protein_coding	SMAP2	FALSE	-	-	-
SMARCC2:chr12:56181712	missense_variant	c.832A>G	p.T278A	protein_coding	SMARCC2	FALSE	-	tolerated	benign
SMG1P5:chr16:30283252	intron_variant,non_coding_transcript_variant	n.1880-1547A>G	-	transcribed_unprocessed_pseudogene	SMG1P5	TRUE	AluSz	-	-
SMPD4BP:chr2:131512705	intron_variant,non_coding_transcript_variant	n.1235-2897A>G	-	processed_transcript	SMPD4BP	FALSE	-	-	-
SMYD3:chr1:246203798	intron_variant	c.531+123403A>G	-	protein_coding	SMYD3	FALSE	-	-	-
SMYD4:chr17:1780754	3_prime_UTR_variant	c.*532A>G	-	protein_coding	SMYD4	TRUE	AluYm1	-	-
SNHG14:chr15:25126372	non_coding_transcript_exon_variant	n.11740A>G	-	lncRNA	SNHG14	TRUE	AluJr	-	-
SNHG14:chr15:25128074	non_coding_transcript_exon_variant	n.13442A>G	-	lncRNA	SNHG14	FALSE	Tigger2	-	-
SNHG14:chr15:25150226	intron_variant,non_coding_transcript_variant	n.160-20310A>G	-	lncRNA	SNHG14	TRUE	AluSz6	-	-
SORBS1:chr10:95546869	intron_variant	c.-132+14451A>G	-	protein_coding	SORBS1	TRUE	AluSx	-	-
SOS1:chr2:39045841	intron_variant	c.864+5303A>G	-	protein_coding	SOS1	TRUE	AluSg	-	-
SPAG9:chr17:50992056	intron_variant	c.2399-1388A>G	-	protein_coding	SPAG9	TRUE	AluJb	-	-
SREBF2:chr22:41856947	intron_variant	c.89-9884A>G	-	protein_coding	SREBF2	TRUE	AluSx1	-	-
ST6GALNAC5:chr1:76903234	intron_variant	c.261+34492A>G	-	protein_coding	ST6GALNAC5	TRUE	L1MB8	-	-
STX1B:chr16:30989904	3_prime_UTR_variant	c.*2917A>G	-	protein_coding	STX1B	FALSE	-	-	-
SULT1A1:chr16:28605713	3_prime_UTR_variant	c.*108A>G	-	protein_coding	SULT1A1	TRUE	FLAM_C	-	-
SULT1A1:chr16:28614544	intron_variant	c.-265-4353A>G	-	protein_coding	SULT1A1	TRUE	AluSz	-	-
SV2B:chr15:91138404	intron_variant	c.-392+38041A>G	-	protein_coding	SV2B	TRUE	MER3,MER3	-	-
SYT1:chr12:78934422	intron_variant	c.-216-43377A>G	-	protein_coding	SYT1	TRUE	AluJb	-	-
TAB2:chr6:149348376	intron_variant	c.-90+5543A>G	-	protein_coding	TAB2	TRUE	AluJo	-	-
TAOK1:chr17:29551048	3_prime_UTR_variant	c.*8026A>G	-	protein_coding	TAOK1	TRUE	-	-	-
TARS3:chr15:101714505	intron_variant	c.690+335A>G	-	protein_coding	TARS3	TRUE	AluJb	-	-
TATDN2:chr3:10260385	synonymous_variant	c.663A>G	p.G221=	protein_coding	TATDN2	FALSE	-	-	-
TCF4:chr18:55379990	intron_variant	c.675+23464A>G	-	protein_coding	TCF4	TRUE	AluJb	-	-
TMEM161B-AS1:chr5:88318562	intron_variant,non_coding_transcript_variant	n.577+25919A>G	-	lncRNA	TMEM161B-AS1	TRUE	AluJo	-	-
TMEM98:chr17:32941899	3_prime_UTR_variant	c.*906A>G	-	protein_coding	TMEM98	TRUE	AluJb	-	-
TMTC4:chr13:100627575	intron_variant	c.1507-1425A>G	-	protein_coding	TMTC4	FALSE	MLT1C	-	-
TNRC6A:chr16:24687781	intron_variant,non_coding_transcript_variant	n.402+46772A>G	-	processed_transcript	TNRC6A	TRUE	AluJo	-	-
TNRC6A:chr16:24697913	intron_variant,non_coding_transcript_variant	n.403-52813A>G	-	processed_transcript	TNRC6A	TRUE	AluSc	-	-
TNRC6A:chr16:24699580	intron_variant,non_coding_transcript_variant	n.403-51146A>G	-	processed_transcript	TNRC6A	TRUE	AluJr	-	-
TTLL11:chr9:121950128	intron_variant	c.1751+23881A>G	-	protein_coding	TTLL11	TRUE	-	-	-
TTLL7:chr1:83989398	intron_variant	c.-177+9533A>G	-	protein_coding	TTLL7	TRUE	L1PA16	-	-
TTTY14:chrY:18987376	intron_variant,non_coding_transcript_variant	n.2239+53994A>G	-	lncRNA	TTTY14	TRUE	AluJb	-	-
UBE2QL1:chr5:6448982	missense_variant	c.89A>G	p.K30R	protein_coding	UBE2QL1	TRUE	-	tolerated	benign
UFL1:chr6:96542930	missense_variant	c.1316A>G	p.N439S	protein_coding	UFL1	FALSE	-	tolerated	benign
UPF3A:chr13:114297901	intron_variant	c.847-939A>G	-	protein_coding	UPF3A	TRUE	AluSx4	-	-
UTY:chrY:13374002	intron_variant	c.646-4653A>G	-	protein_coding	UTY	TRUE	L1MB4	-	-
VTI1B:chr14:67670640	intron_variant	c.115+3735A>G	-	protein_coding	VTI1B	TRUE	AluSc	-	-
WDR60:chr7:158868069	intron_variant	c.16-1786A>G	-	protein_coding	WDR60	TRUE	AluJb	-	-
WTAP:chr6:159741732	intron_variant	c.87-356A>G	-	protein_coding	WTAP	TRUE	AluJb	-	-
WWOX:chr16:78544994	intron_variant	c.1056+112242A>G	-	protein_coding	WWOX	FALSE	AluJo	-	-
ZMYND8:chr20:47337588	intron_variant	c.106+10268A>G	-	protein_coding	ZMYND8	FALSE	MIRb	-	-
ZNF605:chr12:132930925	intron_variant	c.229+1788A>G	-	protein_coding	ZNF605	TRUE	AluJb	-	-
ZNF91:chr19:23359387	3_prime_UTR_variant	c.*16A>G	-	protein_coding	ZNF91	TRUE	AluY	-	-
